# Supplementary material
Source: publisher site journal article supplement (https://www.spandidos-publications.com/8332/downloadSupplementary)
Supplement: Supplementary file 1 [file downloadSupplementary]

## Sheet: Table SII 
Table SII. Finally selected articles.
Title	Researcher	Year	Study design	Population	Intervention	Comparator	Outcome evaluation	Language	Publication date	Data availability	Cancer type	Number of cases	Number of controls	Imaging technique	Processing Method	Processing assay	Accuracy	Sensitivity	Specificity	PPV	NPV	AUC	True-positive	True-negative	False-positive	False-negative	(Refs.)
Differential diagnosis of osteoblastic metastases from bone islands in patients with lung cancer by single-source dual-energy CT: Advantages of spectral CT imaging	Y. Dong, S. Zheng, H. Machida, B. Wang, A. Liu, Y. Liu and X. Zhang	2011 to 2013	Retrospective	94 lung cancer patients (79 OBMs, 43 BIs)	ssDECT with spectral CT imaging	Conventional SECT at 140 kVp	Sensitivity, specificity, AUC, ROC analysis	English	2015	10.1016/j.ejrad.2015.01.007	Lung cancer (adenocarcinoma, squamous cell carcinoma, small cell cancer, undetermined type)	79 osteoblastic metastases (OBMs)	43 bone islands (BIs)	ssDECT (80/140 kVp), spectral CT (VMS images at 40–140 keV)	Quantitative spectral parameters analysis for material decomposition (bone/water pair)	CT value (HU), SD of CT value, D bone (wa) D bone (wa), D wa(bone), D wa(bone), spectral curve slope (kk)	High (specific ranges not provided)	0.93	0.933	Not explicitly provided	Not explicitly provided	0.972	Not explicitly provided (79 OBMs confirmed)	Not explicitly provided (43 BIs confirmed)	Not explicitly provided (79 OBMs confirmed)	Not explicitly provided (79 OBMs confirmed)	(30)
Deep neural network based artificial intelligence assisted diagnosis of bone scintigraphy for cancer bone metastasis	Z. Zhao, Y. Pi, L. Jiang, Y. Xiang, J. Wei, P. Yang, et al.	2016-2018	Retrospective	6,021 lung cancer patients (training: 4,817; validation: 602; testing: 602)	AI model based on deep neural networks (DNNs) for bone metastasis diagnosis	Three nuclear medicine physicians (human vs. AI)	ROC analysis, AUC, sensitivity, specificity, accuracy, PPV, NPV	English	2020	10.1038/s41598-020-74135-4	Lung, Prostate, Breast, and other cancers	265 bone metastasis	337 non-metastasis	Whole-body bone scintigraphy (BS) with 99mTc-MDP, anterior/posterior views	Multi-input CNN with ResNet-50 feature extraction and max aggregation	99mTc-MDP (555–740 MBq intravenous injection)	0.9336	93.5% (AI model) vs. 85.0% (best human physician)	93.5% (AI model) vs. 94.5% (human)	Not explicitly stated	Not explicitly stated	0.957 (lung cancer subgroup)	187/200 (93.5% in human-AI competition)	187/200 (93.5% in human-AI competition)	13/200 (6.5% in human-AI competition)	13/200 (6.5% in human-AI competition)	(31)
Automatic identification of suspicious bone metastatic lesions in bone scintigraphy using convolutional neural network	Y. Liu, P. Yang, Y. Pi, L. Jiang, X. Zhong, J. Cheng, et al.	2012 to 2019	Retrospective	1,253 lung cancer patients (subset of 3,352 total patients)	2D CNN (ResNet50-based) for lesion classification	InceptionV3, VGG16, DenseNet169	Sensitivity, specificity, accuracy, PPV, NPV, AUC	English	2021	10.1186/s12880-021-00662-9	Lung cancer	567 patients with bone metastasis (45.25% of lung cancer subset)	686 patients without bone metastasis	Whole-body bone scintigraphy (WBS) with 99 m 99m Tc-MDP	ResNet50 CNN, pretrained on ImageNet, fine-tuned with lesion masks	Manual delineation and annotation of lesions by experts	0.794	0.7616	0.8252	0.8112	0.777	0.87	Not explicitly stated	Not explicitly stated	Not explicitly stated	Not explicitly stated	(32)
Deep learning-based algorithm improves radiologists’ performance in lung cancer bone metastases detection on computed tomography	T. Huo, Y. Xie, Y. Fang, Z. Wang, P. Liu, Y. Duan, et al.	2012 to 2022	Retrospective	126 patients total: 57 patients with biopsy-proven lung cancer bone metastases (positive samples) and 69 without bone metastases (negative samples).	Automated detection and segmentation of LCBM on 3D thin-slice CT images using a novel DCNN model—the improved Cascaded 3D U-Net combined with 3D spatial SE modules and 3D GAU (global attention-up sample) modules, integrating spatial and channel attention mechanisms	Manual ground truth annotations delineated voxel-wise by two board-certified radiologists, cross-checked by two expert radiologists. Comparison of DCNN model performance with five independent radiologists (3–8 years experience). Also evaluated junior radiologists’ performance alone and with DCNN assistance.	Detection evaluated by sensitivity, specificity, accuracy, area under the receiver operating characteristic curve (AUROC). Segmentation evaluated by Dice similarity coefficient, Intersection-over-Union (IoU), and false positives (FPs) per scan. Impact on radiologists assessed via observer study measuring diagnostic accuracy, sensitivity, AUROC, and interpretation time with and without DCNN assist…	English	2023	10.3389/fonc.2023.1125637	Lung cancer (LC) with bone metastases	57 positive cases with LCBM confirmed by biopsy	69 negative cases without bone metastasis confirmed by biopsy	Thin-slice (1–1.25 mm) computed tomography (CT) scans acquired on clinical scanners	Incorporation of 3D Global Attention Up-sampling (3D GAU) modules for channel attention in skip connections. Two-stage cascade: coarse segmentation on down-sampled images followed by fine segmentation on full-resolution images. Manual annotation and review by expert radiologists for ground truth.	DCNN model called “Our network”: improved cascaded 3D U-Net with 3D SE and GAU modules.	87.8% (95% CI: 86.7–88.6%)	89.4% (95% CI: 87.4–89.6%)	85.7% (95% CI: 83.1–88.5%)	not explicitly reported	not explicitly reported	0.875 (95% CI: 0.863–0.883)	not explicitly reported	not explicitly reported	5.24	not explicitly reported	(33)
CT-based radiomics and clinical characteristics for predicting bone metastasis in lung adenocarcinoma patients	Q. Su, B. Wang, J. Guo, P. Nie and W. Xu	2017 to 2019	Retrospective	501 patients with lung adenocarcinoma from March 2017 to March 2019	CT-based radiomics and clinical characteristics for predicting bone metastasis (BM)	Three models (radiomics model, clinical model, and combined model)	Prediction of bone metastasis in lung adenocarcinoma patients	English	2024	10.21037/tlcr-24-38	Lung adenocarcinoma	Training cohort: BM (+) = 64 Validation cohort: BM (+) = 33	Training cohort: BM(-) = 287 Validation cohort: BMBM (-) = 117	Plain chest CT scans	PyRadiomics python software plugin for feature extraction, ITK-SNAP for ROI segmentation	LASSO algorithm for feature selection	Radiomics model: 0.827 (validation cohort) Clinical model: 0.853 (validation cohort)Combined model: 0.860 (validation cohort)	Radiomics model: 0.758 (validation cohort) Clinical model: 0.697 (validation cohort) Combined model: 0.727 (validation cohort)	Radiomics model: 0.846 (validation cohort) Clinical model: 0.897 (validation cohort) Combined model: 0.897 (validation cohort)	Not explicitly provided	Not explicitly provided	Radiomics model: 0.842 (validation cohort) Clinical model: 0.824 (validation cohort) Combined model: 0.866 (validation cohort)	Not explicitly provided	Not explicitly provided	Not explicitly provided	Not explicitly provided	(15)
Automated Diagnosis of Bone Metastasis by Classifying Bone Scintigrams Using a Self-defined Deep Learning Model	Y. Wang, Q. Lin, S. Zhao, X. Zeng, B. Zheng, Y. Cao and Z. Man	2014 to 2019	Retrospective	527 lung cancer patients (267 with bone metastasis, 260 without)	Self-defined 26-layer CNN model for automated classification of bone scintigrams	Classical CNN models (ResNet, VGGNet, DenseNet)	Binary classification of bone scintigrams (Metastasis vs. Non-Metastasis)	English	2024	10.2174/0115734056281578231212104108	Lung cancer	267 (with bone metastasis)	260 (without bone metastasis)	SPECT bone scintigraphy (anterior and posterior views)	Urinary bladder removal using sweep-line algorithm, Pixel-wise fusion of anterior/posterior views, Self-defined 26-layer CNN with attention mechanisms	Supervised classification using manually annotated ground truth	0.8038 (best performance on fused bladder-excluded images)	0.8039	0.8039	0.8051	Not explicitly provided	0.8489	113	119	37	47	(34)
CT, computed tomography; ssDECT, single-source dual-energy CT; SECT, single-energy CT; AUC, area under the curve; ROC, receiver operating characteristic; CI, confidence interval; AI, artificial intelligence; OBMs, osteoblastic metastases; BIs, bone islands; 99mTc-MDP, technetium 99m methylene diphosphonate; WBS, whole-body bone scintigraphy; PPV, positive predictive value; NPV, negative predictiv…
